# Supplementary material for: Healthcare Expenditures among the Elderly in China: The Role of Catastrophic Medical Insurance
Source: MDPI journal article supplement (doi:10.3390/ijerph192114313), 2022-11-02
Supplement: s1 [file s1]

**Table S1. The impact of CMI on healthcare expenditures among the Chinese elderly (DID model).**

| Variables                                     | (1)<br>Logarithm<br>Total<br>Medical<br>Expenditure | (2)<br>Logarithm<br>Total OOP<br>Expenditure | (3)<br>Logarithm<br>Inpatient<br>Expenditure | (4)<br>Logarithm<br>Inpatient<br>OOP<br>Expenditure |
|-----------------------------------------------|-----------------------------------------------------|----------------------------------------------|----------------------------------------------|-----------------------------------------------------|
| $treat_{ipt} \times Post_{it}$                | 0.779***<br>(0.260)                                 | 0.681***<br>(0.177)                          | 0.669***<br>(0.175)                          | 0.751***<br>(0.211)                                 |
| $treat_{ipt}$                                 | -1.248***<br>(0.324)                                | -1.305***<br>(0.337)                         | 0.459<br>(0.435)                             | 0.372<br>(0.309)                                    |
| $Post_{it}$                                   | -                                                   | -                                            | -                                            | -                                                   |
| Age                                           | -0.005<br>(0.006)                                   | -0.010<br>(0.006)                            | 0.007<br>(0.006)                             | -0.002<br>(0.006)                                   |
| Female (Ref: Male)                            | 0.155*<br>(0.092)                                   | 0.253***<br>(0.093)                          | 0.038<br>(0.098)                             | 0.138<br>(0.084)                                    |
| Years of education                            | 0.013<br>(0.014)                                    | -0.011<br>(0.015)                            | 0.012<br>(0.016)                             | 0.006<br>(0.013)                                    |
| Urban or town (Ref: Rural)                    | 0.262<br>(0.161)                                    | -0.011<br>(0.166)                            | -0.211<br>(0.202)                            | -0.211<br>(0.186)                                   |
| Married (Ref: No)                             | 0.037<br>(0.104)                                    | 0.040<br>(0.110)                             | 0.104<br>(0.117)                             | 0.097<br>(0.085)                                    |
| Number of Children alive                      | 0.031*<br>(0.016)                                   | 0.054***<br>(0.017)                          | -0.026<br>(0.024)                            | -0.021<br>(0.022)                                   |
| Live alone (Ref: No)                          | -0.228**<br>(0.097)                                 | -0.118<br>(0.110)                            | -0.090<br>(0.123)                            | 0.001<br>(0.106)                                    |
| URBMI (Ref: NCMS)                             | 0.300**<br>(0.143)                                  | -0.080<br>(0.167)                            | 0.019<br>(0.181)                             | -0.020<br>(0.166)                                   |
| Logarithm of household income per capita      | -0.023<br>(0.028)                                   | -0.049<br>(0.031)                            | 0.043<br>(0.039)                             | 0.037<br>(0.038)                                    |
| Self-rated Health                             | 0.483***<br>(0.049)                                 | 0.494***<br>(0.045)                          | 0.278***<br>(0.056)                          | 0.255***<br>(0.053)                                 |
| Number of chronic diseases                    | -0.385<br>(0.464)                                   | -0.294<br>(0.590)                            | 0.431<br>(0.635)                             | -0.086<br>(0.604)                                   |
| Serious Illness in the past 2 years (Ref: No) | 2.145***<br>(0.093)                                 | 2.069***<br>(0.110)                          | 5.000***<br>(0.164)                          | 4.269***<br>(0.192)                                 |
| Hypertension                                  | 0.921*<br>(0.465)                                   | 0.821<br>(0.608)                             | -0.350<br>(0.621)                            | 0.174<br>(0.600)                                    |
| Diabetes                                      | 1.021**<br>(0.488)                                  | 0.737<br>(0.577)                             | -0.465<br>(0.689)                            | 0.217<br>(0.668)                                    |
| Heart Disease                                 | 0.927**                                             | 0.763                                        | -0.171                                       | 0.207                                               |

|                    |          |          |         |          |
|--------------------|----------|----------|---------|----------|
|                    | (0.444)  | (0.580)  | (0.589) | (0.597)  |
| Stroke or CVD      | 0.668    | 0.339    | -0.290  | 0.187    |
|                    | (0.507)  | (0.616)  | (0.665) | (0.616)  |
| Bronchitis         | 0.848*   | 0.693    | -0.275  | 0.207    |
|                    | (0.457)  | (0.590)  | (0.636) | (0.639)  |
| Tuberculosis       | 0.699    | 0.787    | -0.788  | -0.171   |
|                    | (0.686)  | (0.718)  | (0.901) | (0.848)  |
| Cataracts          | 0.527    | 0.441    | -0.415  | 0.122    |
|                    | (0.507)  | (0.620)  | (0.700) | (0.639)  |
| Glaucoma           | 0.102    | -0.154   | -0.335  | 0.155    |
|                    | (0.612)  | (0.765)  | (0.684) | (0.700)  |
| Cancer             | 2.305*** | 1.906**  | 1.084   | 0.969    |
|                    | (0.521)  | (0.761)  | (1.052) | (1.079)  |
| Prostate Tumor     | 0.661    | 0.426    | -0.622  | 0.072    |
|                    | (0.482)  | (0.572)  | (0.728) | (0.637)  |
| Gastric            | 0.890*   | 0.856    | -0.658  | 0.045    |
|                    | (0.504)  | (0.629)  | (0.757) | (0.751)  |
| Parkinson          | 1.291*   | 0.853    | 0.516   | 0.518    |
|                    | (0.656)  | (0.789)  | (0.799) | (0.891)  |
| Bedsore            | -1.406   | -1.124   | -0.355  | 0.252    |
|                    | (1.107)  | (1.098)  | (0.930) | (0.948)  |
| Arthritis          | 0.931**  | 0.893    | -0.475  | 0.038    |
|                    | (0.456)  | (0.584)  | (0.627) | (0.612)  |
| Dementia           | -0.247   | -0.412   | -1.272  | -0.413   |
|                    | (0.637)  | (0.900)  | (1.031) | (0.938)  |
| Epilepsy           | 1.596*** | 1.984*** | 0.565   | 1.916*** |
|                    | (0.564)  | (0.597)  | (0.630) | (0.661)  |
| Cholecystitis      | 0.606    | 0.383    | -0.353  | 0.242    |
|                    | (0.464)  | (0.595)  | (0.641) | (0.596)  |
| Blood Disease      | 0.494    | 0.215    | 0.112   | 0.402    |
|                    | (0.506)  | (0.613)  | (0.748) | (0.686)  |
| Chronic Nephritis  | 0.255    | -0.154   | 0.110   | 0.937    |
|                    | (0.566)  | (0.782)  | (0.976) | (0.939)  |
| Galactophore       | 1.500    | 1.424    | 2.495   | 2.960**  |
|                    | (0.957)  | (1.120)  | (1.510) | (1.300)  |
| Uterine Tumor      | 1.233    | 1.207    | -0.169  | 0.464    |
|                    | (0.959)  | (1.045)  | (1.270) | (1.334)  |
| Hepatitis          | -        | -        | -       | -        |
| Year = 2011        | -0.080   | -0.126   |         |          |
|                    | (0.121)  | (0.098)  |         |          |
| Year = 2014        | 0.188    | -0.118   | 0.147   | -0.061   |
|                    | (0.120)  | (0.116)  | (0.106) | (0.105)  |
| Province: Tianjing | -0.404   | -0.007   | 0.427   | 0.648*   |

|                       |           |           |           |           |
|-----------------------|-----------|-----------|-----------|-----------|
|                       | (0.484)   | (0.556)   | (0.418)   | (0.352)   |
| Province: Hebei       | -0.479    | -0.452    | -0.083    | 0.043     |
|                       | (0.538)   | (0.418)   | (0.410)   | (0.280)   |
| Province: Shanxi      | -2.012*** | -2.102*** | 0.568     | 0.640**   |
|                       | (0.358)   | (0.412)   | (0.410)   | (0.283)   |
| Province: Liaoning    | -0.867**  | -1.221*** | -0.170    | -0.626*** |
|                       | (0.329)   | (0.255)   | (0.126)   | (0.144)   |
| Province: Jilin       | -0.513    | 0.020     | 0.324     | 0.575     |
|                       | (0.560)   | (0.579)   | (0.505)   | (0.428)   |
| Province: Helongjiang | -1.619*** | -1.602*** | 0.070     | 0.287     |
|                       | (0.281)   | (0.279)   | (0.396)   | (0.267)   |
| Province: Shanghai    | -1.386**  | -1.797*** | -0.452    | -0.213    |
|                       | (0.572)   | (0.419)   | (0.431)   | (0.291)   |
| Province: Jiangsu     | -0.926*** | -1.338*** | -0.046    | 0.061     |
|                       | (0.289)   | (0.293)   | (0.448)   | (0.353)   |
| Province: Zhejiang    | 0.539*    | 0.457*    | -0.775*** | -0.706*** |
|                       | (0.304)   | (0.257)   | (0.130)   | (0.170)   |
| Province: Anhui       | -1.527*** | -1.549*** | 0.522     | 0.723**   |
|                       | (0.327)   | (0.362)   | (0.517)   | (0.356)   |
| Province: Fujian      | 0.340     | 0.577*    | -0.928*** | -0.654*** |
|                       | (0.260)   | (0.293)   | (0.150)   | (0.164)   |
| Province: Jiangxi     | -0.966*** | -1.247*** | -0.171    | -0.085    |
|                       | (0.262)   | (0.333)   | (0.445)   | (0.336)   |
| Province: Shangdong   | -1.452*** | -1.516*** | 0.231     | 0.156     |
|                       | (0.302)   | (0.294)   | (0.417)   | (0.276)   |
| Province: Henan       | -0.958*** | -1.086*** | 0.326     | 0.163     |
|                       | (0.249)   | (0.296)   | (0.425)   | (0.408)   |
| Province: Hubei       | -0.393    | -0.386    | -0.966*** | -1.008*** |
|                       | (0.310)   | (0.281)   | (0.215)   | (0.317)   |
| Province: Hunan       | -1.484*** | -1.496*** | 0.033     | 0.010     |
|                       | (0.344)   | (0.390)   | (0.467)   | (0.395)   |
| Province: Guangdong   | -1.595*** | -1.522*** | 0.113     | 0.109     |
|                       | (0.360)   | (0.377)   | (0.428)   | (0.283)   |
| Province: Guangxi     | -1.705*** | -1.949*** | 0.081     | 0.068     |
|                       | (0.314)   | (0.297)   | (0.473)   | (0.331)   |
| Province: Hainan      | -0.977*** | -1.013**  | 0.315     | -0.317    |
|                       | (0.366)   | (0.472)   | (0.441)   | (0.558)   |
| Province: Chongqing   | -         | -         | -         | -         |
| Province: Sichuan     | -1.125*** | -1.143*** | 0.443     | 0.425     |
|                       | (0.279)   | (0.295)   | (0.434)   | (0.279)   |
| Province: Shaanxi     | -0.578**  | -0.960*** | 0.102     | 0.148     |
|                       | (0.260)   | (0.267)   | (0.509)   | (0.323)   |
| Constant              | 4.772***  | 5.146***  | -1.114    | -0.400    |

|                    |         |         |         |         |
|--------------------|---------|---------|---------|---------|
|                    | (0.646) | (0.619) | (0.690) | (0.611) |
| Observations       | 4,629   | 4,629   | 3,086   | 3,086   |
| Adjusted R-squared | 0.246   | 0.203   | 0.405   | 0.368   |

Note: \*\*\* P<0.01 \*\* P<0.05 \* P<0.1; Robust Standard errors clustered in province level are reported in the Parentheses.

**Table S2. The impact of CMI on healthcare expenditures among the Chinese elderly (Fixed effects model)**

| Variables                                     | (1)<br>Logarithm<br>Total<br>Medical<br>Expenditure | (2)<br>Logarithm<br>Total OOP<br>Expenditure | (3)<br>Logarithm<br>Inpatient<br>Expenditure | (4)<br>Logarithm<br>Inpatient<br>OOP<br>Expenditure |
|-----------------------------------------------|-----------------------------------------------------|----------------------------------------------|----------------------------------------------|-----------------------------------------------------|
| $treat_{ipt} \times Post_{it}$                | 0.776**<br>(0.310)                                  | 0.649***<br>(0.172)                          | 0.577**<br>(0.225)                           | 0.625**<br>(0.237)                                  |
| Age                                           | 0.353<br>(0.209)                                    | 0.398*<br>(0.209)                            | 0.411**<br>(0.147)                           | 0.529**<br>(0.203)                                  |
| Female (Ref: Male)                            | -                                                   | -                                            | -                                            | -                                                   |
| Years of education                            | -                                                   | -                                            | -                                            | -                                                   |
| Urban or town (Ref: Rural)                    | 0.122<br>(0.325)                                    | -0.128<br>(0.295)                            | 0.166<br>(0.449)                             | 0.226<br>(0.409)                                    |
| Married (Ref: No)                             | -0.157<br>(0.176)                                   | -0.047<br>(0.178)                            | 0.348<br>(0.339)                             | -0.017<br>(0.309)                                   |
| Number of Children alive                      | -0.005<br>(0.033)                                   | -0.002<br>(0.030)                            | -0.076**<br>(0.033)                          | -0.162***<br>(0.055)                                |
| Live alone (Ref: No)                          | -0.403**<br>(0.165)                                 | -0.196<br>(0.181)                            | -0.105<br>(0.338)                            | 0.021<br>(0.312)                                    |
| URBMI (Ref: NCMS)                             | 0.303**<br>(0.132)                                  | 0.140<br>(0.117)                             | 0.124<br>(0.247)                             | 0.101<br>(0.262)                                    |
| Logarithm of household income per capita      | -0.016<br>(0.035)                                   | -0.031<br>(0.031)                            | 0.001<br>(0.058)                             | -0.066<br>(0.068)                                   |
| Self-rated Health                             | 0.393***<br>(0.062)                                 | 0.411***<br>(0.058)                          | 0.187*<br>(0.097)                            | 0.242**<br>(0.091)                                  |
| Number of chronic diseases                    | 1.629***<br>(0.318)                                 | 2.927*<br>(1.450)                            | 1.789***<br>(0.563)                          | 1.756***<br>(0.510)                                 |
| Serious Illness in the past 2 years (Ref: No) | 1.888***<br>(0.181)                                 | 1.872***<br>(0.130)                          | 4.396***<br>(0.182)                          | 3.799***<br>(0.186)                                 |
| Hypertension                                  | -1.242***<br>(0.394)                                | -2.536<br>(1.524)                            | -1.713**<br>(0.639)                          | -1.797***<br>(0.537)                                |
| Diabetes                                      | -0.684                                              | -2.253                                       | -1.507                                       | -1.268                                              |

|                   |           |          |           |           |
|-------------------|-----------|----------|-----------|-----------|
|                   | (0.492)   | (1.508)  | (0.878)   | (0.843)   |
| Heart Disease     | -1.266*** | -2.465   | -1.539*** | -1.589*** |
|                   | (0.360)   | (1.503)  | (0.543)   | (0.531)   |
| Stroke or CVD     | -1.347*** | -2.808*  | -1.517**  | -1.568**  |
|                   | (0.315)   | (1.444)  | (0.631)   | (0.608)   |
| Bronchitis        | -1.381*** | -2.614*  | -1.326**  | -1.251**  |
|                   | (0.370)   | (1.484)  | (0.616)   | (0.601)   |
| Tuberculosis      | -1.822**  | -3.061** | -2.936*** | -2.899*** |
|                   | (0.765)   | (1.246)  | (0.920)   | (0.986)   |
| Cataracts         | -1.508*** | -2.730*  | -2.184*** | -1.971*** |
|                   | (0.357)   | (1.435)  | (0.609)   | (0.552)   |
| Glaucoma          | -0.731*   | -2.194   | -1.301    | -0.902    |
|                   | (0.380)   | (1.375)  | (1.309)   | (1.202)   |
| Cancer            | 0.174     | -1.368   | -0.676    | -1.242    |
|                   | (0.656)   | (2.100)  | (1.824)   | (1.691)   |
| Prostate Tumor    | -1.716*** | -2.895*  | -1.849**  | -1.653**  |
|                   | (0.396)   | (1.442)  | (0.857)   | (0.717)   |
| Gastric           | -1.347*** | -2.551*  | -1.920*** | -1.740*** |
|                   | (0.342)   | (1.451)  | (0.613)   | (0.610)   |
| Parkinson         | -0.495    | -1.831   | 0.137     | -0.662    |
|                   | (0.609)   | (1.556)  | (1.788)   | (1.586)   |
| Bedsore           | -4.299*** | -5.409** | -2.786    | -2.576    |
|                   | (1.187)   | (2.116)  | (1.683)   | (1.621)   |
| Arthritis         | -1.145*** | -2.425   | -2.042*** | -1.986*** |
|                   | (0.336)   | (1.446)  | (0.562)   | (0.440)   |
| Dementia          | -3.106*** | -4.648** | -1.802    | -1.637    |
|                   | (0.791)   | (1.736)  | (1.350)   | (1.254)   |
| Epilepsy          | -         | -        | -         | -         |
| Cholecystitis     | -1.441*** | -2.912*  | -1.207*   | -1.093    |
|                   | (0.351)   | (1.466)  | (0.699)   | (0.638)   |
| Blood Disease     | -1.640*** | -2.912*  | -0.863    | -0.965    |
|                   | (0.427)   | (1.584)  | (0.773)   | (0.803)   |
| Chronic Nephritis | -1.935*** | -3.369** | -0.425    | -0.476    |
|                   | (0.528)   | (1.286)  | (1.057)   | (1.005)   |
| Galactophore      | -1.292    | -2.723   | -1.325    | -1.707    |
|                   | (1.190)   | (1.819)  | (1.198)   | (1.324)   |
| Uterine Tumor     | -0.641    | -1.970   | -0.925    | -0.882    |
|                   | (0.782)   | (1.611)  | (1.241)   | (1.352)   |
| Hepatitis         | -2.123*** | -3.283*  | -1.235    | -1.420*   |
|                   | (0.561)   | (1.671)  | (0.856)   | (0.772)   |
| Year = 2011       | -1.115    | -1.354*  |           |           |
|                   | (0.707)   | (0.695)  |           |           |
| Year = 2014       | -1.798    | -2.441*  | -0.877**  | -1.401**  |

|                    |         |         |         |         |
|--------------------|---------|---------|---------|---------|
|                    | (1.261) | (1.225) | (0.351) | (0.540) |
| Observations       | 4,629   | 4,629   | 3,086   | 3,086   |
| Number of id       | 1,543   | 1,543   | 1,543   | 1,543   |
| Adjusted R-squared | 0.149   | 0.126   | 0.312   | 0.296   |

Note: \*\*\* P<0.01 \*\* P<0.05 \* P<0.1; Robust Standard errors clustered in province level are reported in the Parentheses.

**Table S3. The impact of CMI on healthcare expenditures among the Chinese elderly (Fixed effects model and rural sample)**

| Variables                                      | (1)<br>Logarithm Total<br>Medical<br>Expenditure | (2)<br>Logarithm Total<br>OOP Expenditure | (3)<br>Logarithm<br>Inpatient<br>Expenditure | (4)<br>Logarithm<br>Inpatient OOP<br>Expenditure |
|------------------------------------------------|--------------------------------------------------|-------------------------------------------|----------------------------------------------|--------------------------------------------------|
| $treat_{ipt} \times Post_{it}$                 | 0.810***<br>(0.214)                              | 0.641***<br>(0.220)                       | 0.607**<br>(0.274)                           | 0.704***<br>(0.252)                              |
| Age                                            | 0.331*<br>(0.170)                                | 0.396**<br>(0.174)                        | 0.392<br>(0.249)                             | 0.549**<br>(0.224)                               |
| Female (Ref: Male)                             | -                                                | -                                         | -                                            | -                                                |
| Years of education                             | -                                                | -                                         | -                                            | -                                                |
| Urban or town (Ref:<br>Rural)                  | -                                                | -                                         | -                                            | -                                                |
| Married (Ref: No)                              | -0.139<br>(0.245)                                | -0.037<br>(0.255)                         | 0.189<br>(0.421)                             | -0.080<br>(0.393)                                |
| Number of Children<br>alive                    | -0.007<br>(0.035)                                | -0.005<br>(0.035)                         | -0.033<br>(0.043)                            | -0.130***<br>(0.043)                             |
| Live alone (Ref: No)                           | -0.354*<br>(0.195)                               | -0.173<br>(0.194)                         | -0.307<br>(0.304)                            | -0.140<br>(0.279)                                |
| URBMI (Ref: NCMS)                              | 0.496**<br>(0.196)                               | 0.202<br>(0.197)                          | 0.624*<br>(0.370)                            | 0.504<br>(0.330)                                 |
| Logarithm of<br>household income<br>per capita | 0.001<br>(0.043)                                 | -0.011<br>(0.045)                         | -0.004<br>(0.061)                            | -0.074<br>(0.064)                                |
| Self-rated Health                              | 0.383***<br>(0.063)                              | 0.421***<br>(0.064)                       | 0.204*<br>(0.106)                            | 0.266***<br>(0.099)                              |
| Number of chronic                              | -0.476                                           | -0.010                                    | 0.451                                        | 0.498                                            |

|                                                  |          |          |          |          |
|--------------------------------------------------|----------|----------|----------|----------|
| diseases                                         |          |          |          |          |
|                                                  | (0.791)  | (0.745)  | (0.834)  | (0.697)  |
| Serious Illness in the<br>past 2 years (Ref: No) | 1.914*** | 1.807*** | 4.389*** | 3.756*** |
|                                                  | (0.141)  | (0.143)  | (0.261)  | (0.238)  |
| Hypertension                                     | 0.699    | 0.278    | -0.537   | -0.603   |
|                                                  | (0.813)  | (0.766)  | (0.874)  | (0.731)  |
| Diabetes                                         | 1.483*   | 0.632    | 0.458    | 0.564    |
|                                                  | (0.880)  | (0.855)  | (1.069)  | (0.942)  |
| Heart Disease                                    | 1.033    | 0.545    | -0.079   | -0.386   |
|                                                  | (0.818)  | (0.781)  | (0.932)  | (0.781)  |
| Stroke or CVD                                    | 0.789    | -0.046   | -0.007   | -0.365   |
|                                                  | (0.819)  | (0.776)  | (0.983)  | (0.821)  |
| Bronchitis                                       | 0.768    | 0.286    | -0.091   | -0.071   |
|                                                  | (0.801)  | (0.744)  | (0.864)  | (0.735)  |
| Tuberculosis                                     | -0.022   | -0.621   | -1.775   | -1.680   |
|                                                  | (1.141)  | (1.087)  | (1.242)  | (1.095)  |
| Cataracts                                        | 0.521    | 0.288    | -0.865   | -0.747   |
|                                                  | (0.798)  | (0.753)  | (0.899)  | (0.747)  |
| Glaucoma                                         | 1.453*   | 0.665    | -0.154   | -0.165   |
|                                                  | (0.858)  | (0.835)  | (1.343)  | (1.190)  |
| Cancer                                           | 3.384*** | 2.794**  | 2.669    | 2.610    |
|                                                  | (1.173)  | (1.091)  | (1.852)  | (1.767)  |
| Prostate Tumor                                   | 0.557    | 0.322    | -0.479   | -0.459   |
|                                                  | (0.829)  | (0.790)  | (0.920)  | (0.789)  |
| Gastric                                          | 0.807    | 0.375    | -0.676   | -0.611   |
|                                                  | (0.809)  | (0.770)  | (0.944)  | (0.813)  |
| Parkinson                                        | 2.102*   | 1.378    | 2.976*   | 1.571    |
|                                                  | (1.140)  | (0.980)  | (1.601)  | (1.508)  |
| Bedsore                                          | -2.565*  | -2.898** | -1.322   | -1.115   |
|                                                  | (1.364)  | (1.222)  | (2.537)  | (2.364)  |
| Arthritis                                        | 1.014    | 0.534    | -0.669   | -0.741   |
|                                                  | (0.806)  | (0.761)  | (0.868)  | (0.734)  |
| Dementia                                         | -0.740   | -1.618   | -0.429   | -0.380   |
|                                                  | (1.090)  | (1.088)  | (1.214)  | (1.064)  |
| Epilepsy                                         | 1.888**  | 0.902    |          |          |
|                                                  | (0.801)  | (0.758)  |          |          |
| Cholecystitis                                    | 0.611    | 0.061    | 0.200    | 0.130    |
|                                                  | (0.857)  | (0.816)  | (0.965)  | (0.835)  |
| Blood Disease                                    | 0.699    | 0.238    | 0.351    | 0.232    |
|                                                  | (0.855)  | (0.820)  | (0.987)  | (0.864)  |
| Chronic Nephritis                                | -0.337   | -0.820   | 0.213    | 0.399    |
|                                                  | (0.975)  | (1.078)  | (1.454)  | (1.301)  |
| Galactophore                                     | 0.170    | -0.708   | -0.696   | -1.460   |

|                    |         |          |         |          |
|--------------------|---------|----------|---------|----------|
|                    | (1.208) | (1.245)  | (2.240) | (2.241)  |
| Uterine Tumor      | 0.245   | 0.338    | -0.054  | -0.082   |
|                    | (1.357) | (1.429)  | (1.813) | (1.802)  |
| Hepatitis          | -       | -        | -       | -        |
| Year = 2011        | -0.985* | -1.346** |         |          |
|                    | (0.521) | (0.533)  |         |          |
| Year = 2014        | -1.666* | -2.492** | -0.845  | -1.529** |
|                    | (0.985) | (1.010)  | (0.689) | (0.617)  |
| Observations       | 3,944   | 3,944    | 2,600   | 2,600    |
| Number of id       | 1,386   | 1,386    | 1,338   | 1,338    |
| Adjusted R-squared | 0.148   | 0.119    | 0.314   | 0.291    |

Note: \*\*\* P<0.01 \*\* P<0.05 \* P<0.1; Robust Standard errors clustered in province level are reported in the Parentheses.

**Table S4. The impact of CMI on healthcare expenditures among the Chinese elderly (Fixed effects model and urban or town sample)**

| Variables                      | (1)<br>Logarithm<br>Total<br>Medical<br>Expenditure | (2)<br>Logarithm<br>Total OOP<br>Expenditure | (3)<br>Logarithm<br>Inpatient<br>Expenditure | (4)<br>Logarithm<br>Inpatient<br>OOP<br>Expenditure |
|--------------------------------|-----------------------------------------------------|----------------------------------------------|----------------------------------------------|-----------------------------------------------------|
| $treat_{ipt} \times Post_{it}$ | 0.698<br>(0.518)                                    | 0.380<br>(0.536)                             | -0.232<br>(0.593)                            | -0.440<br>(0.514)                                   |
| Age                            | 0.080<br>(0.475)                                    | 0.090<br>(0.470)                             | 0.429<br>(0.685)                             | 0.520<br>(0.639)                                    |
| Female (Ref: Male)             | -                                                   | -                                            | -                                            | -                                                   |
| Years of education             | -                                                   | -                                            | -                                            | -                                                   |
| Urban or town (Ref: Rural)     | -                                                   | -                                            | -                                            | -                                                   |
| Married (Ref: No)              | 0.107<br>(0.601)                                    | 0.211<br>(0.638)                             | 2.448*<br>(1.438)                            | 0.520<br>(0.687)                                    |
| Number of Children alive       | -0.120<br>(0.089)                                   | -0.132<br>(0.106)                            | -0.371*<br>(0.195)                           | -0.340*<br>(0.188)                                  |
| Live alone (Ref: No)           | -0.410<br>(0.546)                                   | -0.066<br>(0.590)                            | 0.264<br>(1.000)                             | 0.406<br>(0.848)                                    |
| URBMI (Ref: NCMS)              | -0.056<br>(0.350)                                   | 0.087<br>(0.374)                             | -0.500<br>(0.491)                            | -0.524<br>(0.442)                                   |



|                                               |                     |                     |                     |                      |
|-----------------------------------------------|---------------------|---------------------|---------------------|----------------------|
| Logarithm of household income per capita      | -0.146<br>(0.134)   | -0.305*<br>(0.175)  | -0.079<br>(0.185)   | -0.062<br>(0.174)    |
| Self-rated Health                             | 0.545***<br>(0.184) | 0.370**<br>(0.187)  | 0.192<br>(0.328)    | 0.114<br>(0.293)     |
| Number of chronic diseases                    | -1.251<br>(1.104)   | -1.948**<br>(0.961) | 1.846<br>(1.379)    | 0.532<br>(1.419)     |
| Serious Illness in the past 2 years (Ref: No) | 1.679***<br>(0.304) | 1.764***<br>(0.330) | 4.294***<br>(0.596) | 3.879***<br>(0.512)  |
| Hypertension                                  | 2.564**<br>(1.224)  | 3.096***<br>(1.128) | -1.267<br>(1.703)   | -0.637<br>(1.669)    |
| Diabetes                                      | 2.298<br>(1.464)    | 2.813**<br>(1.344)  | -3.217**<br>(1.615) | -2.055<br>(1.568)    |
| Heart Disease                                 | 0.975<br>(1.229)    | 2.309**<br>(1.083)  | -1.393<br>(1.522)   | 0.363<br>(1.569)     |
| Stroke or CVD                                 | 1.842<br>(1.370)    | 3.398***<br>(1.131) | -1.640<br>(1.814)   | -0.017<br>(1.771)    |
| Bronchitis                                    | 1.343<br>(1.194)    | 2.425**<br>(1.074)  | -0.516<br>(1.749)   | 0.210<br>(1.697)     |
| Tuberculosis                                  | 3.962**<br>(1.655)  | 3.515*<br>(1.995)   | -4.385**<br>(1.961) | -4.647***<br>(1.699) |
| Cataracts                                     | 1.661<br>(1.314)    | 2.007*<br>(1.124)   | -2.772*<br>(1.641)  | -1.479<br>(1.642)    |
| Glaucoma                                      | 2.040<br>(1.449)    | 3.101**<br>(1.461)  | -0.329<br>(1.771)   | 4.622*<br>(2.425)    |
| Cancer                                        | 1.223<br>(1.261)    | 1.423<br>(1.880)    | -6.201**<br>(2.545) | -5.953***<br>(2.188) |
| Prostate Tumor                                | 0.826<br>(1.277)    | 1.294<br>(1.119)    | -2.715*<br>(1.627)  | -0.926<br>(1.600)    |
| Gastric                                       | 0.966<br>(1.276)    | 2.581**<br>(1.178)  | -0.540<br>(1.608)   | 1.166<br>(1.624)     |
| Parkinson                                     | 1.419<br>(1.937)    | 2.965**<br>(1.445)  | 3.531<br>(4.856)    | 4.230<br>(3.795)     |
| Bedsore                                       | -                   | -                   | -                   | -                    |
| Arthritis                                     | 1.400<br>(1.163)    | 2.355**<br>(0.986)  | -2.173<br>(1.629)   | -0.451<br>(1.677)    |
| Dementia                                      | -1.299<br>(2.713)   | -1.059<br>(2.260)   | -4.916<br>(4.758)   | -3.511<br>(3.671)    |
| Epilepsy                                      | 3.221**<br>(1.606)  | 7.470***<br>(1.418) | -0.353<br>(2.122)   | 1.159<br>(1.979)     |
| Cholecystitis                                 | 1.837<br>(1.306)    | 1.792<br>(1.275)    | -2.055<br>(1.591)   | -0.265<br>(1.500)    |
| Blood Disease                                 | 0.847<br>(1.172)    | 1.366<br>(1.115)    | -1.078<br>(1.564)   | 0.440<br>(1.555)     |

|                    |                     |                    |                   |                   |
|--------------------|---------------------|--------------------|-------------------|-------------------|
| Chronic Nephritis  | 0.908<br>(1.305)    | 1.233<br>(1.549)   | 0.771<br>(3.227)  | -0.008<br>(2.674) |
| Galactophore       | 3.436<br>(2.529)    | 7.184**<br>(3.207) | -1.527<br>(4.600) | 3.695<br>(3.725)  |
| Uterine Tumor      | 5.256***<br>(1.731) | 4.286*<br>(2.546)  | -0.732<br>(2.905) | 0.143<br>(2.419)  |
| Hepatitis          | -                   | -                  | -                 | -                 |
| Year = 2011        | -0.524<br>(1.486)   | -0.253<br>(1.483)  |                   |                   |
| Year = 2014        | -0.129<br>(2.818)   | -0.131<br>(2.787)  | -0.364<br>(2.001) | -0.563<br>(1.862) |
| Observations       | 685                 | 685                | 486               | 486               |
| Number of id       | 300                 | 300                | 281               | 281               |
| Adjusted R-squared | 0.157               | 0.155              | 0.370             | 0.392             |

Note: \*\*\* P<0.01 \*\* P<0.05 \* P<0.1; Robust Standard errors clustered in province level are reported in the Parentheses.

**Table S5. The impact of CMI on healthcare expenditures among the Chinese elderly (Fixed effects model and Low-income sample)**

| Variables                      | (1)<br>Logarithm<br>Total<br>Medical<br>Expenditure | (2)<br>Logarithm<br>Total OOP<br>Expenditure | (3)<br>Logarithm<br>Inpatient<br>Expenditure | (4)<br>Logarithm<br>Inpatient<br>OOP<br>Expenditure |
|--------------------------------|-----------------------------------------------------|----------------------------------------------|----------------------------------------------|-----------------------------------------------------|
| $treat_{ipt} \times Post_{it}$ | 0.515*<br>(0.275)                                   | 0.301<br>(0.289)                             | 0.575*<br>(0.316)                            | 0.507<br>(0.334)                                    |
| Age                            | 0.241<br>(0.210)                                    | 0.473**<br>(0.213)                           | 0.223<br>(0.212)                             | 0.417<br>(0.269)                                    |
| Female (Ref: Male)             | -                                                   | -                                            | -                                            | -                                                   |
| Years of education             | -                                                   | -                                            | -                                            | -                                                   |
| Urban or town (Ref: Rural)     | 0.139<br>(0.385)                                    | 0.127<br>(0.422)                             | -0.479<br>(0.560)                            | 0.394<br>(0.427)                                    |
| Married (Ref: No)              | -0.235<br>(0.296)                                   | -0.064<br>(0.297)                            | -0.040<br>(0.536)                            | -0.491<br>(0.513)                                   |
| Number of Children alive       | 0.008<br>(0.038)                                    | 0.047<br>(0.039)                             | -0.021<br>(0.033)                            | -0.111*<br>(0.058)                                  |
| Live alone (Ref: No)           | -0.426*                                             | -0.200                                       | -0.094                                       | -0.009                                              |

|                                               |          |          |          |          |
|-----------------------------------------------|----------|----------|----------|----------|
|                                               | (0.233)  | (0.233)  | (0.339)  | (0.248)  |
| URBMI (Ref: NCMS)                             | 0.252    | -0.093   | 0.491    | 0.551    |
|                                               | (0.288)  | (0.303)  | (0.714)  | (0.639)  |
| Logarithm of household income per capita      | -0.016   | -0.028   | -0.009   | -0.085   |
|                                               | (0.054)  | (0.055)  | (0.072)  | (0.095)  |
| Self-rated Health                             | 0.340*** | 0.382*** | 0.007    | 0.056    |
|                                               | (0.078)  | (0.079)  | (0.138)  | (0.110)  |
| Number of chronic diseases                    | -1.147   | -0.733   | 2.421    | 2.744    |
|                                               | (0.831)  | (0.766)  | (2.862)  | (2.978)  |
| Serious Illness in the past 2 years (Ref: No) | 1.924*** | 1.695*** | 3.791*** | 3.223*** |
|                                               | (0.169)  | (0.176)  | (0.234)  | (0.278)  |
| Hypertension                                  | 1.262    | 0.906    | -2.587   | -2.964   |
|                                               | (0.861)  | (0.796)  | (2.813)  | (2.841)  |
| Diabetes                                      | 1.986**  | 1.370    | -1.735   | -2.003   |
|                                               | (0.916)  | (0.872)  | (2.691)  | (2.921)  |
| Heart Disease                                 | 1.772**  | 1.500*   | -2.372   | -3.079   |
|                                               | (0.871)  | (0.820)  | (2.981)  | (3.176)  |
| Stroke or CVD                                 | 1.380    | 0.485    | -1.817   | -2.354   |
|                                               | (0.890)  | (0.819)  | (2.693)  | (2.799)  |
| Bronchitis                                    | 1.286    | 0.757    | -2.292   | -2.518   |
|                                               | (0.867)  | (0.790)  | (2.810)  | (2.978)  |
| Tuberculosis                                  | 0.430    | -0.259   | -4.606   | -4.774   |
|                                               | (1.490)  | (1.445)  | (2.861)  | (2.963)  |
| Cataracts                                     | 1.121    | 0.783    | -2.905   | -3.115   |
|                                               | (0.848)  | (0.789)  | (2.936)  | (2.981)  |
| Glaucoma                                      | 2.287**  | 1.726**  | -2.947   | -3.163   |
|                                               | (0.919)  | (0.862)  | (3.382)  | (3.349)  |
| Cancer                                        | 3.634*** | 2.873**  | 4.366    | 4.220    |
|                                               | (1.195)  | (1.180)  | (2.808)  | (3.112)  |
| Prostate Tumor                                | 1.728*   | 1.318    | -2.648   | -2.786   |
|                                               | (0.892)  | (0.828)  | (3.197)  | (3.159)  |
| Gastric                                       | 1.277    | 0.755    | -2.737   | -3.022   |
|                                               | (0.865)  | (0.808)  | (2.857)  | (2.965)  |
| Parkinson                                     | 2.760*** | 1.759*   | 0.973    | -0.627   |
|                                               | (1.018)  | (0.936)  | (3.090)  | (3.015)  |
| Bedsore                                       | -0.471   | -1.124   |          |          |
|                                               | (1.602)  | (1.627)  |          |          |
| Arthritis                                     | 1.611*   | 1.183    | -2.835   | -3.165   |
|                                               | (0.848)  | (0.786)  | (2.704)  | (2.797)  |
| Dementia                                      | -0.061   | -0.576   | -2.439   | -2.628   |
|                                               | (1.240)  | (1.196)  | (2.990)  | (3.103)  |
| Epilepsy                                      | -        | -        | -        | -        |
| Cholecystitis                                 | 1.438    | 1.380    | -1.964   | -2.169   |

|                    |         |          |         |         |
|--------------------|---------|----------|---------|---------|
|                    | (0.958) | (0.888)  | (3.134) | (3.339) |
| Blood Disease      | 1.867** | 1.650*   | -0.971  | -1.418  |
|                    | (0.943) | (0.891)  | (3.262) | (3.484) |
| Chronic Nephritis  | -0.730  | -0.390   | 0.235   | -0.238  |
|                    | (1.000) | (1.039)  | (3.264) | (3.373) |
| Galactophore       | 1.327   | 0.877    | -1.210  | -2.457  |
|                    | (1.230) | (1.191)  | (2.831) | (2.729) |
| Uterine Tumor      | 0.801   | 0.186    | -2.927  | -3.240  |
|                    | (1.616) | (1.440)  | (2.979) | (3.098) |
| Hepatitis          | -       | -        |         |         |
| Year = 2011        | -0.719  | -1.575** |         |         |
|                    | (0.644) | (0.652)  |         |         |
| Year = 2014        | -1.019  | -2.775** | -0.555  | -1.286* |
|                    | (1.218) | (1.231)  | (0.485) | (0.741) |
| Observations       | 2,448   | 2,448    | 1,632   | 1,632   |
| Number of id       | 816     | 816      | 816     | 816     |
| Adjusted R-squared | 0.149   | 0.110    | 0.247   | 0.234   |

Note: \*\*\* P<0.01 \*\* P<0.05 \* P<0.1; Robust Standard errors clustered in province level are reported in the Parentheses.

**Table S6. The impact of CMI on healthcare expenditures among the Chinese elderly (Fixed effects model and High-income sample)**

| Variables                      | (1)<br>Logarithm<br>Total<br>Medical<br>Expenditure | (2)<br>Logarithm<br>Total OOP<br>Expenditure | (3)<br>Logarithm<br>Inpatient<br>Expenditure | (4)<br>Logarithm<br>Inpatient<br>OOP<br>Expenditure |
|--------------------------------|-----------------------------------------------------|----------------------------------------------|----------------------------------------------|-----------------------------------------------------|
| $treat_{ipt} \times Post_{it}$ | 1.046***<br>(0.269)                                 | 0.912***<br>(0.272)                          | 0.385<br>(0.230)                             | 0.483**<br>(0.210)                                  |
| Age                            | 0.524**<br>(0.228)                                  | 0.372<br>(0.236)                             | 0.621**<br>(0.223)                           | 0.650***<br>(0.219)                                 |
| Female (Ref: Male)             | -                                                   | -                                            | -                                            | -                                                   |
| Years of education             | -                                                   | -                                            | -                                            | -                                                   |
| Urban or town (Ref: Rural)     | 0.093<br>(0.415)                                    | -0.297<br>(0.419)                            | 0.610<br>(0.591)                             | 0.285<br>(0.495)                                    |
| Married (Ref: No)              | -0.093<br>(0.341)                                   | -0.040<br>(0.379)                            | 0.649<br>(0.529)                             | 0.407<br>(0.511)                                    |

|                                               |                     |                     |                     |                     |
|-----------------------------------------------|---------------------|---------------------|---------------------|---------------------|
| Number of Children alive                      | -0.028<br>(0.065)   | -0.106<br>(0.064)   | -0.172<br>(0.104)   | -0.255**<br>(0.104) |
| Live alone (Ref: No)                          | -0.365<br>(0.269)   | -0.159<br>(0.274)   | -0.098<br>(0.585)   | 0.070<br>(0.548)    |
| URBMI (Ref: NCMS)                             | 0.426**<br>(0.197)  | 0.327<br>(0.200)    | -0.046<br>(0.168)   | -0.103<br>(0.221)   |
| Logarithm of household income per capita      | -0.065<br>(0.076)   | -0.108<br>(0.077)   | 0.104<br>(0.088)    | 0.081<br>(0.070)    |
| Self-rated Health                             | 0.435***<br>(0.088) | 0.415***<br>(0.089) | 0.303***<br>(0.098) | 0.361***<br>(0.111) |
| Number of chronic diseases                    | 0.057<br>(0.940)    | 0.022<br>(1.004)    | -6.051<br>(4.132)   | -5.731<br>(4.357)   |
| Serious Illness in the past 2 years (Ref: No) | 1.822***<br>(0.189) | 2.043***<br>(0.188) | 4.954***<br>(0.227) | 4.332***<br>(0.201) |
| Hypertension                                  | 0.601<br>(0.977)    | 0.607<br>(1.037)    | 6.310<br>(4.186)    | 5.805<br>(4.398)    |
| Diabetes                                      | 1.066<br>(1.106)    | 0.868<br>(1.167)    | 6.167<br>(4.545)    | 6.108<br>(4.748)    |
| Heart Disease                                 | 0.050<br>(0.983)    | 0.168<br>(1.048)    | 6.591<br>(4.273)    | 6.423<br>(4.499)    |
| Stroke or CVD                                 | 0.291<br>(0.989)    | 0.441<br>(1.052)    | 5.942<br>(4.174)    | 5.595<br>(4.447)    |
| Bronchitis                                    | 0.272<br>(0.930)    | 0.564<br>(0.992)    | 6.910<br>(4.339)    | 6.576<br>(4.496)    |
| Tuberculosis                                  | 0.304<br>(1.229)    | 0.498<br>(1.282)    | 5.083<br>(3.977)    | 4.600<br>(4.256)    |
| Cataracts                                     | 0.233<br>(0.970)    | 0.334<br>(1.020)    | 5.744<br>(4.112)    | 5.632<br>(4.369)    |
| Glaucoma                                      | 0.456<br>(1.057)    | 0.190<br>(1.173)    | 7.803*<br>(4.543)   | 8.025<br>(4.738)    |
| Cancer                                        | 1.432<br>(1.357)    | 1.099<br>(1.540)    | 4.356<br>(4.498)    | 3.085<br>(4.536)    |
| Prostate Tumor                                | -0.683<br>(0.998)   | -0.511<br>(1.042)   | 6.010<br>(4.222)    | 5.815<br>(4.499)    |
| Gastric                                       | 0.443<br>(0.984)    | 0.790<br>(1.054)    | 6.625<br>(4.139)    | 6.596<br>(4.341)    |
| Parkinson                                     | 0.319<br>(1.761)    | 1.399<br>(1.445)    | 6.277<br>(6.781)    | 5.600<br>(6.342)    |
| Bedsore                                       | -3.333**<br>(1.481) | -2.811*<br>(1.490)  | 3.422<br>(5.277)    | 3.280<br>(5.288)    |
| Arthritis                                     | 0.462<br>(0.975)    | 0.538<br>(1.031)    | 5.893<br>(4.322)    | 5.608<br>(4.491)    |
| Dementia                                      | -1.636<br>(1.500)   | -2.313<br>(1.531)   | 6.794<br>(4.040)    | 6.552<br>(4.264)    |

|                    |                     |                    |                    |                     |
|--------------------|---------------------|--------------------|--------------------|---------------------|
| Epilepsy           | 1.766<br>(1.114)    | 3.084*<br>(1.775)  | 6.453<br>(4.051)   | 6.091<br>(4.324)    |
| Cholecystitis      | 0.070<br>(1.030)    | -0.426<br>(1.106)  | 6.568<br>(4.035)   | 6.332<br>(4.307)    |
| Blood Disease      | -0.494<br>(0.993)   | -0.532<br>(1.070)  | 6.637<br>(4.021)   | 6.266<br>(4.225)    |
| Chronic Nephritis  | 0.840<br>(1.094)    | 0.243<br>(1.431)   | 7.082<br>(4.429)   | 6.637<br>(4.590)    |
| Galactophore       | -1.861<br>(2.682)   | -2.067<br>(3.384)  |                    |                     |
| Uterine Tumor      | 2.409*<br>(1.438)   | 2.504<br>(1.612)   | 9.658**<br>(4.374) | 9.382*<br>(4.578)   |
| Hepatitis          | -                   | -                  |                    |                     |
| Year = 2011        | -1.653**<br>(0.708) | -1.203*<br>(0.730) |                    |                     |
| Year = 2014        | -2.944**<br>(1.325) | -2.370*<br>(1.371) | -1.248*<br>(0.629) | -1.492**<br>(0.637) |
| Observations       | 2,181               | 2,181              | 1,454              | 1,454               |
| Number of id       | 727                 | 727                | 727                | 727                 |
| Adjusted R-squared | 0.154               | 0.151              | 0.416              | 0.407               |

Note: \*\*\* P<0.01 \*\* P<0.05 \* P<0.1; Robust Standard errors clustered in province level are reported in the Parentheses.

**Table S7. The impact of CMI on healthcare expenditures among the Chinese elderly (Fixed effects model and sample among those without serious illness in the past 2 years)**

| Variables                      | (1)<br>Logarithm<br>Total<br>Medical<br>Expenditure | (2)<br>Logarithm<br>Total OOP<br>Expenditure | (3)<br>Logarithm<br>Inpatient<br>Expenditure | (4)<br>Logarithm<br>Inpatient<br>OOP<br>Expenditure |
|--------------------------------|-----------------------------------------------------|----------------------------------------------|----------------------------------------------|-----------------------------------------------------|
| $treat_{ipt} \times Post_{it}$ | 0.726***<br>(0.246)                                 | 0.534**<br>(0.255)                           | 0.403*<br>(0.208)                            | 0.476**<br>(0.210)                                  |
| Age                            | 0.353*<br>(0.186)                                   | 0.314*<br>(0.189)                            | 0.077<br>(0.233)                             | 0.084<br>(0.280)                                    |
| Female (Ref: Male)             | -                                                   | -                                            | -                                            | -                                                   |
| Years of education             | -                                                   | -                                            | -                                            | -                                                   |

|                                               |                     |                     |                   |                   |
|-----------------------------------------------|---------------------|---------------------|-------------------|-------------------|
| Urban or town (Ref: Rural)                    | 0.065<br>(0.397)    | -0.159<br>(0.401)   | 0.311<br>(0.313)  | 0.232<br>(0.290)  |
| Married (Ref: No)                             | -0.196<br>(0.295)   | 0.013<br>(0.308)    | 0.208<br>(0.223)  | 0.355*<br>(0.199) |
| Number of Children alive                      | 0.010<br>(0.044)    | 0.017<br>(0.043)    | -0.057<br>(0.054) | -0.101<br>(0.059) |
| Live alone (Ref: No)                          | -0.457**<br>(0.213) | -0.305<br>(0.209)   | -0.497<br>(0.331) | -0.469<br>(0.316) |
| URBMI (Ref: NCMS)                             | 0.429**<br>(0.211)  | 0.173<br>(0.222)    | -0.006<br>(0.377) | 0.071<br>(0.282)  |
| Logarithm of household income per capita      | 0.022<br>(0.053)    | 0.030<br>(0.053)    | 0.032<br>(0.046)  | 0.020<br>(0.035)  |
| Self-rated Health                             | 0.430***<br>(0.073) | 0.448***<br>(0.074) | 0.068<br>(0.090)  | 0.110<br>(0.086)  |
| Number of chronic diseases                    | -0.606<br>(1.003)   | -0.523<br>(0.980)   | 0.188<br>(0.949)  | 0.067<br>(0.784)  |
| Serious Illness in the past 2 years (Ref: No) | -                   | -                   | -                 | -                 |
| Hypertension                                  | 0.927<br>(1.033)    | 0.821<br>(1.009)    | -0.102<br>(1.082) | 0.036<br>(0.882)  |
| Diabetes                                      | 1.819<br>(1.118)    | 1.410<br>(1.101)    | 0.328<br>(0.878)  | 0.445<br>(0.767)  |
| Heart Disease                                 | 0.993<br>(1.038)    | 1.179<br>(1.029)    | 0.095<br>(0.887)  | 0.284<br>(0.741)  |
| Stroke or CVD                                 | 0.871<br>(1.026)    | 0.607<br>(1.026)    | -0.323<br>(1.397) | -0.545<br>(1.125) |
| Bronchitis                                    | 0.970<br>(1.010)    | 0.923<br>(0.969)    | -0.174<br>(1.046) | 0.122<br>(0.910)  |
| Tuberculosis                                  | 0.618<br>(1.314)    | 0.375<br>(1.282)    | -1.579<br>(1.597) | -1.445<br>(1.375) |
| Cataracts                                     | 0.927<br>(1.024)    | 0.910<br>(0.988)    | -0.168<br>(1.065) | 0.111<br>(0.859)  |
| Glaucoma                                      | 1.784<br>(1.114)    | 1.129<br>(1.138)    | -0.289<br>(0.938) | -0.158<br>(0.758) |
| Cancer                                        | 2.181<br>(1.595)    | 2.221<br>(1.604)    | -0.558<br>(1.048) | -0.399<br>(0.913) |
| Prostate Tumor                                | 0.712<br>(1.050)    | 0.677<br>(1.011)    | -0.501<br>(0.918) | -0.394<br>(0.752) |
| Gastric                                       | 0.760<br>(1.032)    | 0.743<br>(1.016)    | 0.517<br>(1.048)  | 0.636<br>(0.885)  |
| Parkinson                                     | 0.195<br>(1.317)    | 0.958<br>(1.237)    | 2.853<br>(2.711)  | 3.154<br>(2.546)  |
| Bedsore                                       | -2.742*<br>(1.032)  | -2.665*<br>(1.016)  | -2.936<br>(1.048) | -2.532<br>(0.885) |

|                    |          |          |           |           |
|--------------------|----------|----------|-----------|-----------|
|                    | (1.568)  | (1.456)  | (2.363)   | (2.059)   |
| Arthritis          | 1.235    | 1.067    | -0.489    | -0.441    |
|                    | (1.025)  | (1.002)  | (0.965)   | (0.806)   |
| Dementia           | -1.910   | -2.655** | -0.648    | -0.442    |
|                    | (1.343)  | (1.331)  | (1.521)   | (1.310)   |
| Epilepsy           | 1.877*   | 1.431    |           |           |
|                    | (1.010)  | (0.993)  |           |           |
| Cholecystitis      | 0.437    | -0.047   | -0.296    | -0.290    |
|                    | (1.097)  | (1.084)  | (0.670)   | (0.548)   |
| Blood Disease      | 0.432    | 0.550    | 0.370     | 0.558     |
|                    | (1.090)  | (1.083)  | (1.063)   | (0.911)   |
| Chronic Nephritis  | 0.882    | 0.148    | 0.855     | 0.933     |
|                    | (1.113)  | (1.507)  | (1.288)   | (1.161)   |
| Galactophore       | 0.497    | 0.409    | -8.246*** | -8.145*** |
|                    | (4.218)  | (4.688)  | (1.888)   | (1.589)   |
| Uterine Tumor      | 3.034    | 2.620    |           |           |
|                    | (2.288)  | (2.275)  |           |           |
| Hepatitis          | -        | -        |           |           |
| Year = 2011        | -1.209** | -1.246** |           |           |
|                    | (0.570)  | (0.579)  |           |           |
| Year = 2014        | -1.859*  | -2.009*  | -0.058    | -0.203    |
|                    | (1.076)  | (1.093)  | (0.700)   | (0.836)   |
| Observations       | 3,617    | 3,617    | 2,308     | 2,308     |
| Number of id       | 1,504    | 1,504    | 1,386     | 1,386     |
| Adjusted R-squared | 0.059    | 0.045    | 0.031     | 0.045     |

Note: \*\*\* P<0.01 \*\* P<0.05 \* P<0.1; Robust Standard errors clustered in province level are reported in the Parentheses.

**Table S8. The impact of CMI on healthcare expenditures among the Chinese elderly (Fixed effects model and sample among those with serious illness in the past 2 years)**

| Variables                      | (1)<br>Logarithm<br>Total<br>Medical<br>Expenditure | (2)<br>Logarithm<br>Total OOP<br>Expenditure | (3)<br>Logarithm<br>Inpatient<br>Expenditure | (4)<br>Logarithm<br>Inpatient<br>OOP<br>Expenditure |
|--------------------------------|-----------------------------------------------------|----------------------------------------------|----------------------------------------------|-----------------------------------------------------|
| $treat_{ipt} \times Post_{it}$ | 0.989**<br>(0.448)                                  | 1.297***<br>(0.494)                          | 1.398*<br>(0.737)                            | 1.216<br>(0.953)                                    |



|                                               |                    |                   |                     |                     |
|-----------------------------------------------|--------------------|-------------------|---------------------|---------------------|
| Age                                           | -0.441<br>(0.496)  | -0.293<br>(0.489) | -0.210<br>(1.208)   | 0.632<br>(1.341)    |
| Female (Ref: Male)                            | -                  | -                 | -                   | -                   |
| Years of education                            | -                  | -                 | -                   | -                   |
| Urban or town (Ref: Rural)                    | 0.519<br>(0.661)   | 0.643<br>(0.619)  | -0.400<br>(1.806)   | 0.237<br>(1.654)    |
| Married (Ref: No)                             | 0.434<br>(0.639)   | -0.064<br>(0.535) | 2.636**<br>(1.079)  | 1.355*<br>(0.730)   |
| Number of Children alive                      | 0.067<br>(0.112)   | -0.055<br>(0.098) | -0.241<br>(0.235)   | -0.452**<br>(0.182) |
| Live alone (Ref: No)                          | -0.444<br>(0.528)  | 0.116<br>(0.599)  | 1.452<br>(0.851)    | 1.266*<br>(0.698)   |
| URBMI (Ref: NCMS)                             | 0.066<br>(0.373)   | -0.020<br>(0.325) | 0.653<br>(1.151)    | 0.394<br>(1.035)    |
| Logarithm of household income per capita      | 0.117<br>(0.087)   | 0.094<br>(0.099)  | 0.491**<br>(0.214)  | 0.126<br>(0.300)    |
| Self-rated Health                             | 0.175<br>(0.152)   | 0.231<br>(0.153)  | 0.432<br>(0.489)    | 0.603<br>(0.392)    |
| Number of chronic diseases                    | -0.471<br>(0.783)  | 0.475<br>(1.028)  | 7.585*<br>(4.030)   | 5.000**<br>(1.924)  |
| Serious Illness in the past 2 years (Ref: No) | -                  | -                 | -                   | -                   |
| Hypertension                                  | 1.119<br>(0.889)   | 0.375<br>(1.117)  | -6.287<br>(4.531)   | -4.542**<br>(1.950) |
| Diabetes                                      | 1.600<br>(1.055)   | 0.111<br>(1.284)  | -6.180<br>(3.701)   | -3.150<br>(2.336)   |
| Heart Disease                                 | 0.790<br>(0.942)   | 0.076<br>(1.157)  | -7.617*<br>(3.674)  | -4.930**<br>(1.839) |
| Stroke or CVD                                 | 1.082<br>(0.998)   | 0.271<br>(1.125)  | -6.804**<br>(3.264) | -4.415**<br>(1.571) |
| Bronchitis                                    | 0.362<br>(0.858)   | -0.898<br>(1.139) | -6.627<br>(3.948)   | -4.074**<br>(1.907) |
| Tuberculosis                                  | 4.336**<br>(2.076) | 2.070<br>(2.339)  |                     |                     |
| Cataracts                                     | 0.386<br>(0.869)   | -0.209<br>(1.074) | -7.497*<br>(4.231)  | -4.876**<br>(2.057) |
| Glaucoma                                      | 1.544*<br>(0.913)  | 1.204<br>(1.195)  | -7.449<br>(4.438)   | -2.106<br>(3.724)   |
| Cancer                                        | 1.129<br>(1.181)   | -0.961<br>(1.878) | -8.768<br>(5.511)   | -7.401**<br>(3.482) |
| Prostate Tumor                                | 0.883<br>(0.846)   | 0.017<br>(1.090)  | -6.403<br>(4.430)   | -3.474<br>(2.430)   |

|                    |                     |                      |                      |                      |
|--------------------|---------------------|----------------------|----------------------|----------------------|
| Gastric            | 1.343<br>(0.913)    | 0.613<br>(1.167)     | -7.859**<br>(3.724)  | -5.638**<br>(2.033)  |
| Parkinson          | 3.814***<br>(1.443) | 2.219<br>(1.469)     | -2.055<br>(5.145)    | -1.000<br>(3.107)    |
| Bedsore            | -1.472<br>(1.067)   | -3.763***<br>(1.265) |                      |                      |
| Arthritis          | 0.454<br>(0.851)    | 0.038<br>(1.008)     | -8.299*<br>(4.721)   | -5.142*<br>(2.650)   |
| Dementia           | 2.020*<br>(1.037)   | 1.624<br>(1.260)     |                      |                      |
| Epilepsy           | -                   | -                    | -                    | -                    |
| Cholecystitis      | 1.200<br>(0.914)    | 0.186<br>(1.224)     | -5.344<br>(4.584)    | -2.204<br>(2.310)    |
| Blood Disease      | 0.762<br>(0.965)    | -0.517<br>(1.149)    | -5.610<br>(4.163)    | -3.698<br>(2.267)    |
| Chronic Nephritis  | -0.278<br>(0.975)   | -1.967<br>(1.250)    | -10.650**<br>(4.897) | -9.027***<br>(3.041) |
| Galactophore       | 0.344<br>(1.120)    | 0.020<br>(1.362)     | -4.681<br>(3.037)    | -3.386<br>(3.182)    |
| Uterine Tumor      | 1.770*<br>(1.058)   | -0.127<br>(1.133)    | -6.834<br>(6.602)    | -3.747<br>(3.395)    |
| Hepatitis          | -                   | -                    |                      |                      |
| Year = 2011        | 1.655<br>(1.501)    | 0.978<br>(1.467)     |                      |                      |
| Year = 2014        | 2.974<br>(2.925)    | 1.360<br>(2.850)     | 0.433<br>(3.392)     | -2.242<br>(3.878)    |
| Observations       | 1,012               | 1,012                | 778                  | 778                  |
| Number of id       | 716                 | 716                  | 621                  | 621                  |
| Adjusted R-squared | 0.144               | 0.140                | 0.182                | 0.188                |

Note: \*\*\* P<0.01 \*\* P<0.05 \* P<0.1; Robust Standard errors clustered in province level are reported in the Parentheses.

**Table S9. The impact of CMI on healthcare expenditures among the Chinese elderly (Fixed effects model and excluding those confounding provinces)**

| Variables | (1)         | (2)         | (3)         | (4)         |
|-----------|-------------|-------------|-------------|-------------|
|           | Logarithm   | Logarithm   | Logarithm   | Logarithm   |
|           | Total       | Total OOP   | Inpatient   | Inpatient   |
|           | Medical     | Expenditure | Expenditure | OOP         |
|           | Expenditure |             |             | Expenditure |

|                                               |                     |                     |                      |                      |
|-----------------------------------------------|---------------------|---------------------|----------------------|----------------------|
| $treat_{ipt} \times Post_{it}$                | 0.752**<br>(0.328)  | 0.588***<br>(0.197) | 0.588**<br>(0.257)   | 0.652**<br>(0.251)   |
| Age                                           | 0.352<br>(0.236)    | 0.422<br>(0.255)    | 0.233<br>(0.169)     | 0.288<br>(0.219)     |
| Female (Ref: Male)                            | -                   | -                   | -                    | -                    |
| Years of education                            | -                   | -                   | -                    | -                    |
| Urban or town (Ref: Rural)                    | 0.194<br>(0.303)    | 0.050<br>(0.271)    | 0.028<br>(0.545)     | 0.113<br>(0.509)     |
| Married (Ref: No)                             | -0.131<br>(0.209)   | 0.006<br>(0.197)    | 0.813***<br>(0.217)  | 0.334<br>(0.282)     |
| Number of Children alive                      | 0.004<br>(0.050)    | 0.011<br>(0.045)    | -0.143***<br>(0.035) | -0.267***<br>(0.052) |
| Live alone (Ref: No)                          | -0.420**<br>(0.187) | -0.228<br>(0.194)   | -0.225<br>(0.377)    | -0.087<br>(0.349)    |
| URBMI (Ref: NCMS)                             | 0.452***<br>(0.136) | 0.198<br>(0.148)    | 0.345<br>(0.270)     | 0.337<br>(0.278)     |
| Logarithm of household income per capita      | -0.023<br>(0.037)   | -0.034<br>(0.032)   | 0.004<br>(0.063)     | -0.054<br>(0.071)    |
| Self-rated Health                             | 0.344***<br>(0.054) | 0.367***<br>(0.051) | 0.129<br>(0.093)     | 0.222**<br>(0.100)   |
| Number of chronic diseases                    | -0.707<br>(1.245)   | -0.918<br>(1.285)   | 2.003***<br>(0.660)  | 1.951***<br>(0.567)  |
| Serious Illness in the past 2 years (Ref: No) | 2.051***<br>(0.183) | 1.946***<br>(0.155) | 4.312***<br>(0.224)  | 3.652***<br>(0.208)  |
| Hypertension                                  | 1.086<br>(1.288)    | 1.311<br>(1.292)    | -1.897**<br>(0.767)  | -1.969***<br>(0.626) |
| Diabetes                                      | 1.727<br>(1.500)    | 1.668<br>(1.489)    | -1.830*<br>(0.981)   | -1.605<br>(0.959)    |
| Heart Disease                                 | 0.992<br>(1.319)    | 1.425<br>(1.382)    | -1.639**<br>(0.634)  | -1.657**<br>(0.611)  |
| Stroke or CVD                                 | 0.958<br>(1.241)    | 1.026<br>(1.289)    | -1.780**<br>(0.712)  | -1.805**<br>(0.662)  |
| Bronchitis                                    | 0.900<br>(1.182)    | 1.140<br>(1.235)    | -1.630**<br>(0.760)  | -1.433*<br>(0.727)   |
| Tuberculosis                                  | 0.850<br>(1.441)    | 0.809<br>(1.461)    | -2.971***<br>(1.000) | -3.164**<br>(1.098)  |
| Cataracts                                     | 0.805<br>(1.253)    | 1.122<br>(1.340)    | -2.383***<br>(0.725) | -2.169***<br>(0.629) |
| Glaucoma                                      | 1.721<br>(1.245)    | 1.776<br>(1.240)    | -0.402<br>(1.362)    | 0.051<br>(1.309)     |
| Cancer                                        | 2.610               | 2.174               | -1.384               | -2.086               |

|                    |         |         |           |           |
|--------------------|---------|---------|-----------|-----------|
|                    | (1.508) | (1.966) | (2.285)   | (2.030)   |
| Prostate Tumor     | 0.799   | 1.121   | -1.816*   | -1.633**  |
|                    | (1.226) | (1.323) | (0.939)   | (0.765)   |
| Gastric            | 1.199   | 1.527   | -1.820**  | -1.635**  |
|                    | (1.277) | (1.290) | (0.782)   | (0.763)   |
| Parkinson          | 1.950   | 1.955   | -0.677    | -1.018    |
|                    | (1.660) | (1.684) | (1.974)   | (1.706)   |
| Bedsore            | -1.080  | -0.777  | -1.432    | -1.135    |
|                    | (1.512) | (1.313) | (1.908)   | (1.716)   |
| Arthritis          | 1.233   | 1.438   | -2.324*** | -2.217*** |
|                    | (1.316) | (1.336) | (0.618)   | (0.450)   |
| Dementia           | -0.630  | -0.768  | -1.853    | -1.673    |
|                    | (1.656) | (1.471) | (1.286)   | (1.189)   |
| Epilepsy           | 2.319   | 3.863*  |           |           |
|                    | (1.365) | (1.874) |           |           |
| Cholecystitis      | 0.893   | 0.841   | -1.144    | -1.203    |
|                    | (1.211) | (1.240) | (0.875)   | (0.796)   |
| Blood Disease      | 0.719   | 0.890   | -0.910    | -0.897    |
|                    | (1.240) | (1.262) | (0.945)   | (0.965)   |
| Chronic Nephritis  | 0.083   | -0.294  | -1.484    | -1.658    |
|                    | (1.373) | (1.321) | (1.175)   | (1.090)   |
| Galactophore       | -       | -       |           |           |
| Uterine Tumor      | 1.266   | 1.425   | -2.028    | -2.128*   |
|                    | (1.873) | (2.046) | (1.245)   | (1.092)   |
| Hepatitis          | -0.291  | -0.215  | -2.154**  | -2.508**  |
|                    | (1.358) | (1.430) | (0.870)   | (0.891)   |
| Year = 2011        | -1.088  | -1.378  |           |           |
|                    | (0.790) | (0.835) |           |           |
| Year = 2014        | -1.773  | -2.515  | -0.365    | -0.733    |
|                    | (1.427) | (1.487) | (0.350)   | (0.545)   |
| Observations       | 3,711   | 3,711   | 2,474     | 2,474     |
| Number of id       | 1,237   | 1,237   | 1,237     | 1,237     |
| Adjusted R-squared | 0.156   | 0.125   | 0.299     | 0.284     |

Note: \*\*\* P<0.01 \*\* P<0.05 \* P<0.1; Robust Standard errors clustered in province level are reported in the Parentheses.

**Table S10. The impact of CMI on healthcare expenditures among the Chinese elderly (Fixed effects model based on the Propensity score matching)**

|           | (1)       | (2)       | (3)       | (4)       |
|-----------|-----------|-----------|-----------|-----------|
| Variables | Logarithm | Logarithm | Logarithm | Logarithm |

|                                               | Total<br>Medical<br>Expenditure | Total OOP<br>Expenditure | Inpatient<br>Expenditure | Inpatient<br>OOP<br>Expenditure |
|-----------------------------------------------|---------------------------------|--------------------------|--------------------------|---------------------------------|
| $treat_{ipt} \times Post_{it}$                | 0.773**<br>(0.317)              | 0.645***<br>(0.180)      | 0.581**<br>(0.229)       | 0.621**<br>(0.241)              |
| Age                                           | 0.344<br>(0.207)                | 0.389*<br>(0.208)        | 0.382**<br>(0.144)       | 0.515**<br>(0.205)              |
| Female (Ref: Male)                            | -                               | -                        | -                        | -                               |
| Years of education                            | -                               | -                        | -                        | -                               |
| Urban or town (Ref: Rural)                    | 0.106<br>(0.328)                | -0.136<br>(0.299)        | 0.191<br>(0.428)         | 0.242<br>(0.405)                |
| Married (Ref: No)                             | -0.171<br>(0.180)               | -0.057<br>(0.183)        | 0.342<br>(0.339)         | -0.019<br>(0.311)               |
| Number of Children alive                      | -0.005<br>(0.032)               | -0.002<br>(0.030)        | -0.077**<br>(0.034)      | -0.163***<br>(0.056)            |
| Live alone (Ref: No)                          | -0.419**<br>(0.171)             | -0.201<br>(0.185)        | -0.137<br>(0.318)        | -0.007<br>(0.298)               |
| URBMI (Ref: NCMS)                             | 0.317**<br>(0.134)              | 0.157<br>(0.119)         | 0.136<br>(0.247)         | 0.113<br>(0.259)                |
| Logarithm of household income per capita      | -0.017<br>(0.035)               | -0.030<br>(0.031)        | -0.005<br>(0.058)        | -0.068<br>(0.069)               |
| Self-rated Health                             | 0.393***<br>(0.064)             | 0.412***<br>(0.060)      | 0.193*<br>(0.097)        | 0.246**<br>(0.094)              |
| Number of chronic diseases                    | 1.921***<br>(0.375)             | 4.896***<br>(0.277)      | 1.818***<br>(0.561)      | 1.799***<br>(0.506)             |
| Serious Illness in the past 2 years (Ref: No) | 1.891***<br>(0.179)             | 1.872***<br>(0.132)      | 4.411***<br>(0.195)      | 3.792***<br>(0.199)             |
| Hypertension                                  | -1.531***<br>(0.419)            | -4.499***<br>(0.343)     | -1.734**<br>(0.621)      | -1.836***<br>(0.522)            |
| Diabetes                                      | -0.979*<br>(0.489)              | -4.226***<br>(0.382)     | -1.553*<br>(0.881)       | -1.327<br>(0.832)               |
| Heart Disease                                 | -1.557***<br>(0.377)            | -4.439***<br>(0.283)     | -1.604***<br>(0.559)     | -1.660***<br>(0.545)            |
| Stroke or CVD                                 | -1.635***<br>(0.385)            | -4.775***<br>(0.331)     | -1.476**<br>(0.612)      | -1.554**<br>(0.583)             |
| Bronchitis                                    | -1.669***<br>(0.416)            | -4.584***<br>(0.311)     | -1.338**<br>(0.601)      | -1.280**<br>(0.577)             |
| Tuberculosis                                  | -2.111**<br>(0.930)             | -5.027***<br>(0.705)     | -2.971***<br>(0.922)     | -2.945***<br>(0.990)            |
| Cataracts                                     | -1.810***<br>(0.430)            | -4.706***<br>(0.321)     | -2.253***<br>(0.614)     | -2.054***<br>(0.562)            |

|                    |                      |                      |                      |                      |
|--------------------|----------------------|----------------------|----------------------|----------------------|
| Glaucoma           | -1.019**<br>(0.448)  | -4.162***<br>(0.368) | -1.329<br>(1.283)    | -0.943<br>(1.189)    |
| Cancer             | -0.125<br>(0.708)    | -3.342***<br>(0.931) | -0.753<br>(1.789)    | -1.319<br>(1.668)    |
| Prostate Tumor     | -2.000***<br>(0.482) | -4.865***<br>(0.462) | -1.931**<br>(0.847)  | -1.743**<br>(0.712)  |
| Gastric            | -1.636***<br>(0.363) | -4.516***<br>(0.278) | -1.930***<br>(0.612) | -1.769***<br>(0.605) |
| Parkinson          | -0.841<br>(0.624)    | -3.840***<br>(0.583) | 0.145<br>(1.740)     | -0.674<br>(1.541)    |
| Bedsore            | -6.171***<br>(1.364) | -8.686***<br>(1.262) | -2.823<br>(1.672)    | -2.606<br>(1.617)    |
| Arthritis          | -1.447***<br>(0.366) | -4.400***<br>(0.255) | -2.115***<br>(0.560) | -2.039***<br>(0.431) |
| Dementia           | -3.427***<br>(0.777) | -6.691***<br>(0.579) | -2.215<br>(1.344)    | -1.986<br>(1.276)    |
| Epilepsy           | -                    | -                    | -                    | -                    |
| Cholecystitis      | -1.736***<br>(0.399) | -4.892***<br>(0.344) | -1.245*<br>(0.679)   | -1.145*<br>(0.628)   |
| Blood Disease      | -1.944***<br>(0.459) | -4.883***<br>(0.394) | -0.942<br>(0.792)    | -1.047<br>(0.824)    |
| Chronic Nephritis  | -2.221***<br>(0.585) | -5.332***<br>(0.561) | -0.463<br>(1.053)    | -0.520<br>(1.000)    |
| Galactophore       | -1.520<br>(1.384)    | -4.625***<br>(1.464) | -0.971<br>(1.223)    | -1.466<br>(1.245)    |
| Uterine Tumor      | -1.053<br>(0.999)    | -4.069***<br>(0.986) | -1.607<br>(1.508)    | -1.433<br>(1.581)    |
| Hepatitis          | -2.410***<br>(0.513) | -5.247***<br>(0.604) | -1.234<br>(0.846)    | -1.438*<br>(0.771)   |
| Year = 2011        | -1.080<br>(0.703)    | -1.323*<br>(0.692)   |                      |                      |
| Year = 2014        | -1.737<br>(1.252)    | -2.387*<br>(1.218)   | -0.790**<br>(0.347)  | -1.347**<br>(0.548)  |
| Observations       | 4,605                | 4,605                | 3,070                | 3,070                |
| Number of id       | 1,535                | 1,535                | 1,535                | 1,535                |
| Adjusted R-squared | 0.150                | 0.126                | 0.315                | 0.295                |

Note: \*\*\* P<0.01 \*\* P<0.05 \* P<0.1; Robust Standard errors clustered in province level are reported in the Parentheses.
